# Supplementary material for: Tolerance of aquifer stoneflies to repeated hypoxia exposure and oxygen dynamics in an alluvial aquifer
Source: Oxford University Press journal article supplement (doi:10.1242/jeb.225623), 2020-01-01
Supplement: jeb225623supp.pdf [file jeb225623supp.pdf]

**Table S1:** Pairwise comparison results for Two-way ANOVA for the interaction of taxa and oxygen level. Oxygen levels (mg/L) are represented by letters (A = 12, B = 8, C = 6, D = 4, E = 2, F = 0.5, G = <0.5 (closed period), and H = 12 (recovery period)). Significant p-values are in bold.

| Contrast              | Estimate | SE     | df  | t.ratio | p.value          |
|-----------------------|----------|--------|-----|---------|------------------|
| A,Aquifer - B,Aquifer | 0.13372  | 0.1066 | 824 | 1.255   | 0.9972           |
| A,Aquifer - C,Aquifer | 0.10954  | 0.1066 | 824 | 1.028   | 0.9997           |
| A,Aquifer - D,Aquifer | 0.21281  | 0.1066 | 824 | 1.997   | 0.8267           |
| A,Aquifer - E,Aquifer | 0.27159  | 0.1066 | 824 | 2.548   | 0.437            |
| A,Aquifer - F,Aquifer | 0.46244  | 0.1066 | 824 | 4.339   | <b>0.0017</b>    |
| A,Aquifer - G,Aquifer | 0.76634  | 0.1242 | 824 | 6.172   | <b>&lt;.0001</b> |
| A,Aquifer - H,Aquifer | 0.35426  | 0.1066 | 824 | 3.324   | 0.0706           |
| A,Aquifer - A,Benthic | -1.2503  | 0.1    | 824 | -12.499 | <b>&lt;.0001</b> |
| A,Aquifer - B,Benthic | -0.7791  | 0.1019 | 824 | -7.647  | <b>&lt;.0001</b> |
| A,Aquifer - C,Benthic | -0.5209  | 0.1019 | 824 | -5.113  | <b>&lt;.0001</b> |
| A,Aquifer - D,Benthic | -0.3197  | 0.1    | 824 | -3.196  | 0.1022           |
| A,Aquifer - E,Benthic | 0.09336  | 0.1    | 824 | 0.933   | 0.9999           |
| A,Aquifer - F,Benthic | 0.46609  | 0.1    | 824 | 4.659   | <b>0.0004</b>    |
| A,Aquifer - G,Benthic | 0.78823  | 0.1031 | 824 | 7.643   | <b>&lt;.0001</b> |
| A,Aquifer - H,Benthic | -0.5484  | 0.104  | 824 | -5.271  | <b>&lt;.0001</b> |
| B,Aquifer - C,Aquifer | -0.0242  | 0.1066 | 824 | -0.227  | 1                |
| B,Aquifer - D,Aquifer | 0.07909  | 0.1066 | 824 | 0.742   | 1                |
| B,Aquifer - E,Aquifer | 0.13787  | 0.1066 | 824 | 1.294   | 0.9961           |
| B,Aquifer - F,Aquifer | 0.32872  | 0.1066 | 824 | 3.084   | 0.1381           |
| B,Aquifer - G,Aquifer | 0.63262  | 0.1242 | 824 | 5.095   | <b>&lt;.0001</b> |
| B,Aquifer - H,Aquifer | 0.22054  | 0.1066 | 824 | 2.069   | 0.7842           |
| B,Aquifer - A,Benthic | -1.384   | 0.1    | 824 | -13.836 | <b>&lt;.0001</b> |
| B,Aquifer - B,Benthic | -0.9128  | 0.1019 | 824 | -8.96   | <b>&lt;.0001</b> |
| B,Aquifer - C,Benthic | -0.6546  | 0.1019 | 824 | -6.426  | <b>&lt;.0001</b> |
| B,Aquifer - D,Benthic | -0.4534  | 0.1    | 824 | -4.533  | <b>0.0007</b>    |
| B,Aquifer - E,Benthic | -0.0404  | 0.1    | 824 | -0.403  | 1                |
| B,Aquifer - F,Benthic | 0.33237  | 0.1    | 824 | 3.323   | 0.0709           |
| B,Aquifer - G,Benthic | 0.65451  | 0.1031 | 824 | 6.346   | <b>&lt;.0001</b> |
| B,Aquifer - H,Benthic | -0.6821  | 0.104  | 824 | -6.556  | <b>&lt;.0001</b> |
| C,Aquifer - D,Aquifer | 0.10327  | 0.1066 | 824 | 0.969   | 0.9999           |
| C,Aquifer - E,Aquifer | 0.16205  | 0.1066 | 824 | 1.521   | 0.98             |

|                       |         |        |     |         |                  |
|-----------------------|---------|--------|-----|---------|------------------|
| C,Aquifer - F,Aquifer | 0.35289 | 0.1066 | 824 | 3.311   | 0.0734           |
| C,Aquifer - G,Aquifer | 0.6568  | 0.1242 | 824 | 5.29    | <b>&lt;.0001</b> |
| C,Aquifer - H,Aquifer | 0.24472 | 0.1066 | 824 | 2.296   | 0.6267           |
| C,Aquifer - A,Benthic | -1.3599 | 0.1    | 824 | -13.594 | <b>&lt;.0001</b> |
| C,Aquifer - B,Benthic | -0.8886 | 0.1019 | 824 | -8.722  | <b>&lt;.0001</b> |
| C,Aquifer - C,Benthic | -0.6305 | 0.1019 | 824 | -6.188  | <b>&lt;.0001</b> |
| C,Aquifer - D,Benthic | -0.4292 | 0.1    | 824 | -4.291  | <b>0.0021</b>    |
| C,Aquifer - E,Benthic | -0.0162 | 0.1    | 824 | -0.162  | 1                |
| C,Aquifer - F,Benthic | 0.35655 | 0.1    | 824 | 3.564   | <b>0.0331</b>    |
| C,Aquifer - G,Benthic | 0.67869 | 0.1031 | 824 | 6.581   | <b>&lt;.0001</b> |
| C,Aquifer - H,Benthic | -0.6579 | 0.104  | 824 | -6.324  | <b>&lt;.0001</b> |
| D,Aquifer - E,Aquifer | 0.05878 | 0.1066 | 824 | 0.552   | 1                |
| D,Aquifer - F,Aquifer | 0.24963 | 0.1066 | 824 | 2.342   | 0.592            |
| D,Aquifer - G,Aquifer | 0.55353 | 0.1242 | 824 | 4.458   | <b>0.001</b>     |
| D,Aquifer - H,Aquifer | 0.14145 | 0.1066 | 824 | 1.327   | 0.9949           |
| D,Aquifer - A,Benthic | -1.4631 | 0.1    | 824 | -14.627 | <b>&lt;.0001</b> |
| D,Aquifer - B,Benthic | -0.9919 | 0.1019 | 824 | -9.736  | <b>&lt;.0001</b> |
| D,Aquifer - C,Benthic | -0.7337 | 0.1019 | 824 | -7.202  | <b>&lt;.0001</b> |
| D,Aquifer - D,Benthic | -0.5325 | 0.1    | 824 | -5.323  | <b>&lt;.0001</b> |
| D,Aquifer - E,Benthic | -0.1195 | 0.1    | 824 | -1.194  | 0.9984           |
| D,Aquifer - F,Benthic | 0.25328 | 0.1    | 824 | 2.532   | 0.4489           |
| D,Aquifer - G,Benthic | 0.57542 | 0.1031 | 824 | 5.58    | <b>&lt;.0001</b> |
| D,Aquifer - H,Benthic | -0.7612 | 0.104  | 824 | -7.317  | <b>&lt;.0001</b> |
| E,Aquifer - F,Aquifer | 0.19084 | 0.1066 | 824 | 1.791   | 0.9194           |
| E,Aquifer - G,Aquifer | 0.49475 | 0.1242 | 824 | 3.985   | <b>0.0073</b>    |
| E,Aquifer - H,Aquifer | 0.08267 | 0.1066 | 824 | 0.776   | 1                |
| E,Aquifer - A,Benthic | -1.5219 | 0.1    | 824 | -15.214 | <b>&lt;.0001</b> |
| E,Aquifer - B,Benthic | -1.0507 | 0.1019 | 824 | -10.313 | <b>&lt;.0001</b> |
| E,Aquifer - C,Benthic | -0.7925 | 0.1019 | 824 | -7.779  | <b>&lt;.0001</b> |
| E,Aquifer - D,Benthic | -0.5913 | 0.1    | 824 | -5.911  | <b>&lt;.0001</b> |
| E,Aquifer - E,Benthic | -0.1782 | 0.1    | 824 | -1.782  | 0.9224           |
| E,Aquifer - F,Benthic | 0.1945  | 0.1    | 824 | 1.944   | 0.8544           |
| E,Aquifer - G,Benthic | 0.51664 | 0.1031 | 824 | 5.01    | <b>0.0001</b>    |
| E,Aquifer - H,Benthic | -0.82   | 0.104  | 824 | -7.882  | <b>&lt;.0001</b> |
| F,Aquifer - G,Aquifer | 0.3039  | 0.1242 | 824 | 2.448   | 0.5119           |
| F,Aquifer - H,Aquifer | -0.1082 | 0.1066 | 824 | -1.015  | 0.9998           |
| F,Aquifer - A,Benthic | -1.7127 | 0.1    | 824 | -17.122 | <b>&lt;.0001</b> |
| F,Aquifer - B,Benthic | -1.2415 | 0.1019 | 824 | -12.186 | <b>&lt;.0001</b> |
| F,Aquifer - C,Benthic | -0.9834 | 0.1019 | 824 | -9.652  | <b>&lt;.0001</b> |
| F,Aquifer - D,Benthic | -0.7821 | 0.1    | 824 | -7.819  | <b>&lt;.0001</b> |
| F,Aquifer - E,Benthic | -0.3691 | 0.1    | 824 | -3.69   | <b>0.0216</b>    |

|                       |         |        |     |         |               |
|-----------------------|---------|--------|-----|---------|---------------|
| F,Aquifer - F,Benthic | 0.00365 | 0.1    | 824 | 0.037   | 1             |
| F,Aquifer - G,Benthic | 0.32579 | 0.1031 | 824 | 3.159   | 0.1131        |
| F,Aquifer - H,Benthic | -1.0108 | 0.104  | 824 | -9.716  | <.0001        |
| G,Aquifer - H,Aquifer | -0.4121 | 0.1242 | 824 | -3.319  | 0.0717        |
| G,Aquifer - A,Benthic | -2.0167 | 0.1186 | 824 | -17.006 | <.0001        |
| G,Aquifer - B,Benthic | -1.5454 | 0.1201 | 824 | -12.862 | <.0001        |
| G,Aquifer - C,Benthic | -1.2873 | 0.1201 | 824 | -10.714 | <.0001        |
| G,Aquifer - D,Benthic | -1.086  | 0.1186 | 824 | -9.158  | <.0001        |
| G,Aquifer - E,Benthic | -0.673  | 0.1186 | 824 | -5.675  | <.0001        |
| G,Aquifer - F,Benthic | -0.3003 | 0.1186 | 824 | -2.532  | 0.449         |
| G,Aquifer - G,Benthic | 0.02189 | 0.1212 | 824 | 0.181   | 1             |
| G,Aquifer - H,Benthic | -1.3147 | 0.122  | 824 | -10.778 | <.0001        |
| H,Aquifer - A,Benthic | -1.6046 | 0.1    | 824 | -16.041 | <.0001        |
| H,Aquifer - B,Benthic | -1.1333 | 0.1019 | 824 | -11.124 | <.0001        |
| H,Aquifer - C,Benthic | -0.8752 | 0.1019 | 824 | -8.59   | <.0001        |
| H,Aquifer - D,Benthic | -0.674  | 0.1    | 824 | -6.737  | <.0001        |
| H,Aquifer - E,Benthic | -0.2609 | 0.1    | 824 | -2.608  | 0.3942        |
| H,Aquifer - F,Benthic | 0.11183 | 0.1    | 824 | 1.118   | 0.9992        |
| H,Aquifer - G,Benthic | 0.43396 | 0.1031 | 824 | 4.208   | <b>0.003</b>  |
| H,Aquifer - H,Benthic | -0.9026 | 0.104  | 824 | -8.676  | <.0001        |
| A,Benthic - B,Benthic | 0.47125 | 0.095  | 824 | 4.96    | <b>0.0001</b> |
| A,Benthic - C,Benthic | 0.7294  | 0.095  | 824 | 7.677   | <.0001        |
| A,Benthic - D,Benthic | 0.93062 | 0.093  | 824 | 10.004  | <.0001        |
| A,Benthic - E,Benthic | 1.34367 | 0.093  | 824 | 14.444  | <.0001        |
| A,Benthic - F,Benthic | 1.71639 | 0.093  | 824 | 18.451  | <.0001        |
| A,Benthic - G,Benthic | 2.03853 | 0.0964 | 824 | 21.158  | <.0001        |
| A,Benthic - H,Benthic | 0.70194 | 0.0973 | 824 | 7.213   | <.0001        |
| B,Benthic - C,Benthic | 0.25815 | 0.097  | 824 | 2.663   | 0.3568        |
| B,Benthic - D,Benthic | 0.45938 | 0.095  | 824 | 4.835   | <b>0.0002</b> |
| B,Benthic - E,Benthic | 0.87243 | 0.095  | 824 | 9.182   | <.0001        |
| B,Benthic - F,Benthic | 1.24515 | 0.095  | 824 | 13.105  | <.0001        |
| B,Benthic - G,Benthic | 1.56729 | 0.0983 | 824 | 15.949  | <.0001        |
| B,Benthic - H,Benthic | 0.2307  | 0.0992 | 824 | 2.325   | 0.6049        |
| C,Benthic - D,Benthic | 0.20123 | 0.095  | 824 | 2.118   | 0.7532        |
| C,Benthic - E,Benthic | 0.61428 | 0.095  | 824 | 6.465   | <.0001        |
| C,Benthic - F,Benthic | 0.987   | 0.095  | 824 | 10.388  | <.0001        |
| C,Benthic - G,Benthic | 1.30914 | 0.0983 | 824 | 13.322  | <.0001        |
| C,Benthic - H,Benthic | -0.0275 | 0.0992 | 824 | -0.277  | 1             |
| D,Benthic - E,Benthic | 0.41305 | 0.093  | 824 | 4.44    | <b>0.0011</b> |
| D,Benthic - F,Benthic | 0.78577 | 0.093  | 824 | 8.447   | <.0001        |
| D,Benthic - G,Benthic | 1.10791 | 0.0964 | 824 | 11.499  | <.0001        |

|                       |         |        |     |         |                  |
|-----------------------|---------|--------|-----|---------|------------------|
| D,Benthic - H,Benthic | -0.2287 | 0.0973 | 824 | -2.35   | 0.5863           |
| E,Benthic - F,Benthic | 0.37272 | 0.093  | 824 | 4.007   | <b>0.0067</b>    |
| E,Benthic - G,Benthic | 0.69486 | 0.0964 | 824 | 7.212   | <b>&lt;.0001</b> |
| E,Benthic - H,Benthic | -0.6417 | 0.0973 | 824 | -6.594  | <b>&lt;.0001</b> |
| F,Benthic - G,Benthic | 0.32214 | 0.0964 | 824 | 3.343   | 0.0666           |
| F,Benthic - H,Benthic | -1.0145 | 0.0973 | 824 | -10.424 | <b>&lt;.0001</b> |
| G,Benthic - H,Benthic | -1.3366 | 0.1005 | 824 | -13.3   | <b>&lt;.0001</b> |
